# Supplementary material for: Quantitative Evaluation of Stem-like Markers of Human Glioblastoma Using Single-Cell RNA Sequencing Datasets
Source: MDPI journal article supplement (doi:10.3390/cancers15051557), 2023-03-02
Supplement: s1 [file s1]

**Figure S 1.** Selection of markers based on the expression and the over-expression in stem-like subtype. The markers with top expressions are marked

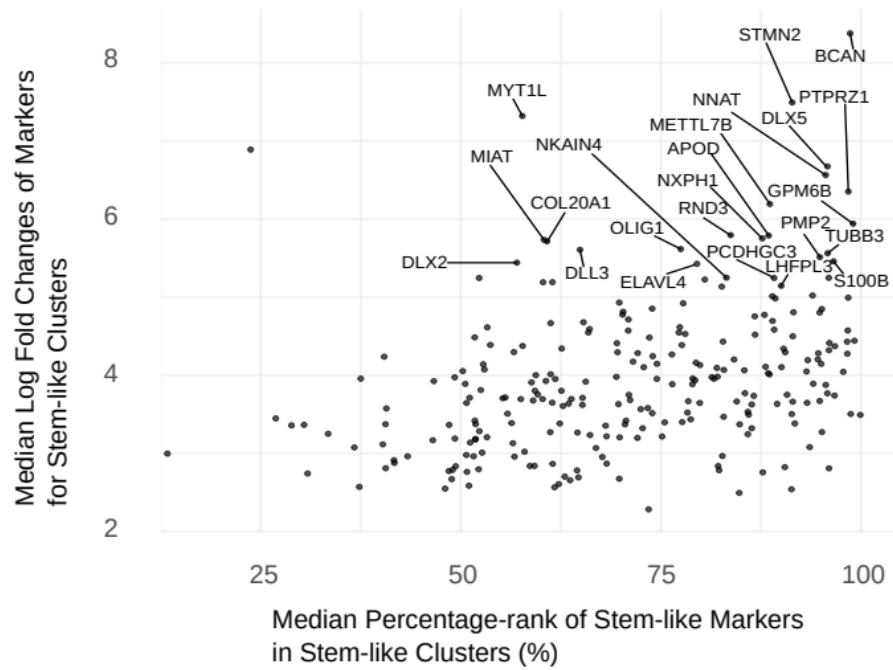

**Figure S 2.** Marker genes whose encoded proteins locate at membrane. Plotted with respect to frequency-significance selection

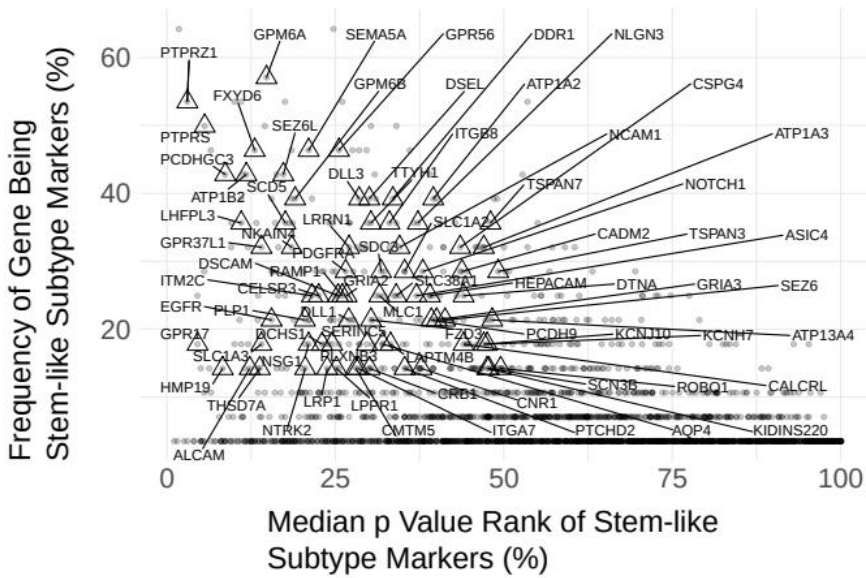

**Table S 1.** GBM samples and their corresponding names. The original names and the substituted names are listed in the same order

| Study           | Original names                                                                                                                                                                                                                             | Substituted names                                                                                                                             |
|-----------------|--------------------------------------------------------------------------------------------------------------------------------------------------------------------------------------------------------------------------------------------|-----------------------------------------------------------------------------------------------------------------------------------------------|
| Darmanis et al. | BT_S1, BT_S2, BT_S4, BT_S6                                                                                                                                                                                                                 | D1, D2, D3, D4                                                                                                                                |
| Patel et al.    | MGH26, MGH28, MGH29, MGH30, MGH31                                                                                                                                                                                                          | P1, P2, P3, P4, P5                                                                                                                            |
| Neftel et al.   | BT749, BT771, BT786, BT830,<br>BT920, BT1160, BT1187, MGH66,<br>MGH85, MGH100, MGH101, MGH102,<br>MGH104, MGH105, MGH106, MGH110,<br>MGH113, MGH115, MGH121, MGH122,<br>MGH124, MGH125, MGH128, MGH129,<br>MGH136, MGH143, MGH151, MGH152, | N1, N2, N3, N4<br>N5, N6, N7, N8<br>N9, N10, N11, N12<br>N13, N14, N15, N16<br>N17, N18, N19, N20<br>N21, N22, N23, N24<br>N25, N26, N27, N28 |

**Table S 2.** GBM stem-like subtype - NPC1 cluster enrichment example (N20, cluster3)

| GO:BP terms                              | term_id    | adjusted_p_value |
|------------------------------------------|------------|------------------|
| nervous system development               | GO:0007399 | 3.65E-015        |
| gliogenesis                              | GO:0042063 | 4.03E-11         |
| glial cell differentiation               | GO:0010001 | 5.89E-11         |
| system development                       | GO:0048731 | 1.19E-10         |
| central nervous system development       | GO:0007417 | 5.73E-10         |
| neurogenesis                             | GO:0022008 | 1.47E-09         |
| regulation of nervous system development | GO:0051960 | 1.85E-09         |
| anatomical structure development         | GO:0048856 | 1.15E-08         |
| multicellular organism development       | GO:0007275 | 5.15E-08         |
| cell adhesion                            | GO:0007155 | 5.36E-08         |

**Table S 3.** GBM stem-like subtype - NPC2 cluster enrichment example (N10, cluster 2)

| GO:BP terms                              | term_id    | adjusted_p_value |
|------------------------------------------|------------|------------------|
| generation of neurons                    | GO:0048699 | 6.00E-17         |
| neurogenesis                             | GO:0022008 | 7.85E-17         |
| nervous system development               | GO:0007399 | 2.34E-16         |
| neuron differentiation                   | GO:0030182 | 4.08E-13         |
| neuron projection development            | GO:0031175 | 1.17E-10         |
| neuron development                       | GO:0048666 | 2.97E-10         |
| regulation of nervous system development | GO:0051960 | 3.90E-10         |
| system development                       | GO:0048731 | 6.30E-10         |
| cell development                         | GO:0048468 | 8.23E-10         |
| regulation of neurogenesis               | GO:0050767 | 2.48E-09         |

**Table S 4.** Overview of data analysis results, markers and their applications

| Parameters                                                                                                                                                        | Corresponding figures              | Recommended markers                                                             | Applications                                                                                                         |
|-------------------------------------------------------------------------------------------------------------------------------------------------------------------|------------------------------------|---------------------------------------------------------------------------------|----------------------------------------------------------------------------------------------------------------------|
| 1. universality/significance (high)                                                                                                                               | Figure 2b                          | BCAN, SOX4, GPM6A, PTPRZ1, SOX11, MAP2                                          | Immunohistochemistry, in-vitro imaging, flow cytometry                                                               |
| 1. universality/significance (high)<br>2. over-expression in GBM compared to normal cells (high)                                                                  | Figure 2d                          | PTPRS, TUBB3, GPR56                                                             | In-vivo therapeutic targeting                                                                                        |
| 1. universality/significance (high)<br>2. high expression level (high)                                                                                            | Figure 2b<br>Figure S1             | BCAN, PTPRZ1, PMP2, GPM6B, TUBB3, S100B                                         | In-vitro assays that require high expression level                                                                   |
| 1. universality/significance (high)<br>2. over-expression in GBM compared to normal cells (high)<br>3. high expression level (high)                               | Figure 2d<br>Figure 4              | TUBB3                                                                           | In-vivo targeting that requires a high expression level (such as in-vivo radionuclide-conjugated antibody targeting) |
| 1. universality/significance (moderate)<br>2. over-expression in GBM compared to normal cells (moderate)<br>3. cell surface marker                                | Figure 2b<br>Figure 2d             | PTPRS, ATP1A3, MAGED4, NNAT, ASIC4, ITGA7, GPR56, HMP19, LPPR1, MAGED4B, PTCHD2 | In-vivo targeting that requires cell surface markers (such as targeted protein drugs)                                |
| 1. universality/significance (high)<br>2. over-expression in GBM compared to normal cells (high)<br>3. high expression level (moderate)<br>4. cell surface marker | Figure 2b<br>Figure 2d<br>Figure 4 | PTPRS, GPR56                                                                    | In-vivo targeting that requires cell surface markers (such as targeted protein drugs)                                |
